# Supplementary material for: Epigenetic Landscapes Explain Partially Reprogrammed Cells and Identify Key Reprogramming Genes
Source: PubMed Central journal article supplement (PMC4133049; doi:10.1371/journal.pcbi.1003734), 2014-08-14

A. Continuous Cell Type Correlation Matrix

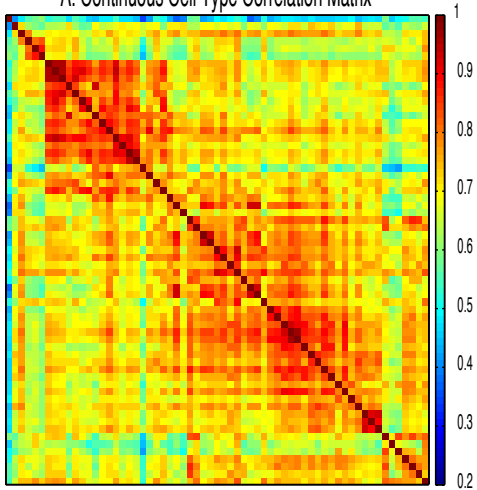

B. Binarized Cell Type Correlation Matrix

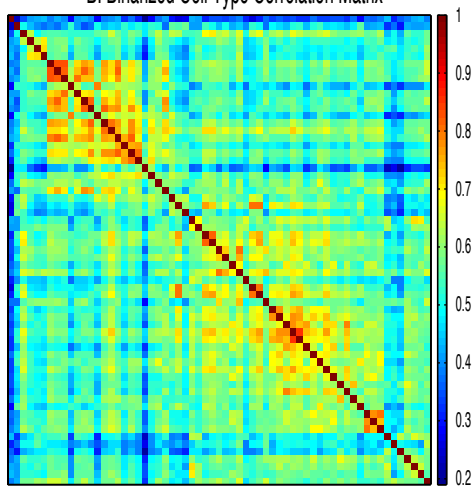

Supplement: pcbi.1003734.s001.pdf [file pcbi.1003734.s001.pdf]
