# Supplementary material for: Epigenetic Landscapes Explain Partially Reprogrammed Cells and Identify Key Reprogramming Genes
Source: PubMed Central journal article supplement (PMC4133049; doi:10.1371/journal.pcbi.1003734), 2014-08-14

## Random Vector Projection on Natural Cell Types

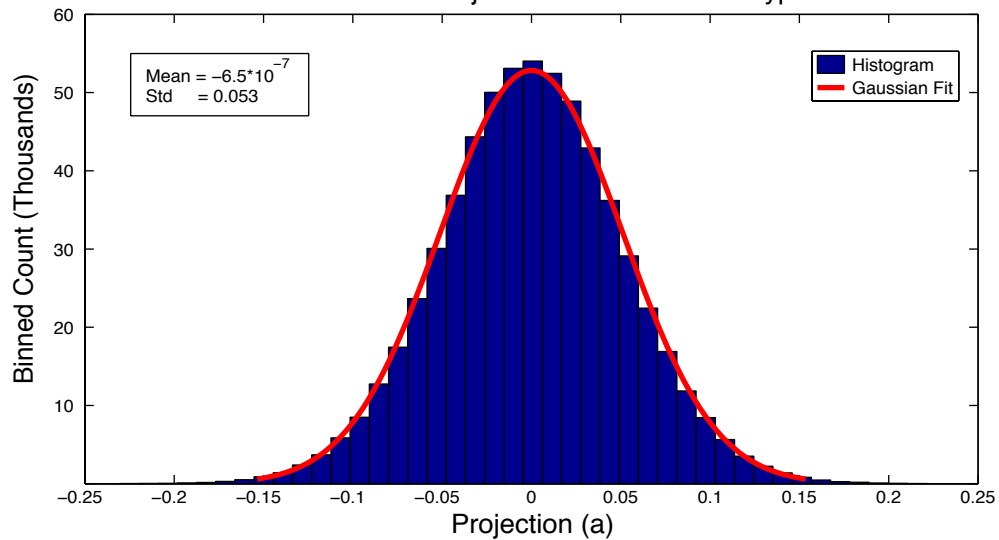

Supplement: pcbi.1003734.s002.pdf [file pcbi.1003734.s002.pdf]
