# Supplementary material for: Epigenetic Landscapes Explain Partially Reprogrammed Cells and Identify Key Reprogramming Genes
Source: PubMed Central journal article supplement (PMC4133049; doi:10.1371/journal.pcbi.1003734), 2014-08-14
Supplement: pcbi.1003734.s010.pdf [file pcbi.1003734.s010.pdf]

Table S1. Classifying Top ESC Reprogramming Candidates.

| TF                            | Z Score | $\eta$ ( $10^{-3}$ ) | Rank $Z*\eta$ | Classification  | Citation or GO Term           |
|-------------------------------|---------|----------------------|---------------|-----------------|-------------------------------|
| <i>Pou5f1</i> ( <i>Oct4</i> ) | 2.77    | 2.45                 | 1             | Reprogramming   | <sup>1</sup>                  |
| <i>Gm13242</i>                | 1.59    | 3.98                 | 2             | Unknown         | biological process            |
| <i>Nr0b1</i>                  | 2.44    | 2.59                 | 3             | Pluripotency    | <sup>2</sup>                  |
| <i>Nanog</i>                  | 2.30    | 2.65                 | 4             | Reprogramming   | <sup>1</sup>                  |
| <i>Zfp42</i>                  | 2.04    | 2.74                 | 5             | Pluripotency    | <sup>3</sup>                  |
| <i>Hsf2bp</i>                 | 1.42    | 3.49                 | 6             | Unknown         | biological process            |
| <i>Esrrb</i>                  | 1.74    | 2.49                 | 7             | Reprogramming   | <sup>1</sup>                  |
| <i>Zscan4f</i>                | 1.01    | 3.86                 | 8             | Reprogramming   | <sup>4</sup>                  |
| <i>Klf4</i>                   | 1.04    | 3.25                 | 9             | Reprogramming   | <sup>1</sup>                  |
| <i>Zfp459</i>                 | 0.83    | 3.98                 | 10            | Unknown         | biological process            |
| <i>Zscan4c</i>                | 0.82    | 3.86                 | 11            | Pluripotency    | telomere lengthening          |
| <i>Zic3</i>                   | 1.17    | 2.65                 | 12            | Pluripotency    | <sup>5</sup>                  |
| <i>Zfp936</i>                 | 1.15    | 2.66                 | 13            | Unknown         | biological process            |
| <i>Zfp229</i>                 | 0.76    | 3.84                 | 14            | Unknown         | biological process            |
| <i>Zfp600</i>                 | 0.71    | 3.98                 | 15            | Unknown         | biological process            |
| <i>Zfp640</i>                 | 1.10    | 2.55                 | 16            | Differentiation | skeletal system morphogenesis |
| <i>Gm10324</i>                | 1.09    | 2.55                 | 17            | Unknown         | biological process            |
| <i>Zscan10</i>                | 1.04    | 2.65                 | 18            | Pluripotency    | <sup>6</sup>                  |
| <i>Utf1</i>                   | 2.03    | 1.30                 | 19            | Reprogramming   | <sup>1</sup>                  |
| <i>2610305D13Rik</i>          | 1.02    | 2.45                 | 20            | Unknown         | biological process            |
| <i>Tfcp2l1</i>                | 1.26    | 1.90                 | 21            | Pluripotency    | <sup>7</sup>                  |
| <i>Klf8</i>                   | 0.58    | 4.12                 | 22            | Differentiation | <sup>8</sup>                  |
| <i>Epas1</i>                  | 0.70    | 3.18                 | 23            | Differentiation | erythrocyte differentiation   |
| <i>Tbx3</i>                   | 1.09    | 2.03                 | 24            | Reprogramming   | <sup>1</sup>                  |
| <i>Tcf15</i>                  | 0.89    | 2.37                 | 25            | Differentiation | <sup>9</sup>                  |

Table has top 50 embryonic stem cell (ESC) reprogramming candidates (as ranked by z-score times predictivity,  $\eta_i^{\mu}$ ). Classification of each TF is either justified by paper citation or GO Process term. Reprogramming TFs are in a pre-existing reprogramming protocol, pluripotency TFs help maintain the ESC state but are non-essential for reprogramming, differentiation TFs are expressed in ESC but help induce cell fate change *in vivo*, and unknown TFs have no known function.

**Table S1 Continued. Classifying Top ESC Reprogramming Candidates.**

| TF              | Z Score | $\eta$ ( $10^{-3}$ ) | Rank $Z*\eta$ | Classification             | Citation or GO Term                                |
|-----------------|---------|----------------------|---------------|----------------------------|----------------------------------------------------|
| <i>Tcf15</i>    | 0.82    | 2.56                 | 26            | Unknown                    | regulation of transcription                        |
| <i>Sall4</i>    | 1.72    | 1.17                 | 27            | Reprogramming <sup>1</sup> |                                                    |
| <i>Zfp553</i>   | 0.87    | 2.22                 | 28            | Unknown                    | regulation of transcription                        |
| <i>Sox2</i>     | 1.96    | 0.97                 | 29            | Reprogramming <sup>1</sup> |                                                    |
| <i>Grhl3</i>    | 0.61    | 2.75                 | 30            | Differentiation            | ectoderm development                               |
| <i>Zbtb10</i>   | 0.75    | 2.22                 | 31            | Unknown                    | negative regulation of transcription               |
| <i>Mycn</i>     | 1.90    | 0.85                 | 32            | Differentiation            | lung development                                   |
| <i>Sap30</i>    | 0.93    | 1.72                 | 33            | Differentiation            | skeletal muscle cell differentiation               |
| <i>Zbtb8a</i>   | 0.83    | 1.88                 | 34            | Unknown                    | regulation of transcription                        |
| <i>Klf5</i>     | 1.23    | 1.25                 | 35            | Differentiation            | skeletal muscle cell differentiation               |
| <i>Sall1</i>    | 1.30    | 1.18                 | 36            | Differentiation            | neural tube development                            |
| <i>AA987161</i> | 0.60    | 2.36                 | 37            | Unknown                    | biological process                                 |
| <i>Klf9</i>     | 0.70    | 1.96                 | 38            | Differentiation            | embryo implantation                                |
| <i>Myc</i>      | 0.73    | 1.86                 | 39            | Reprogramming <sup>1</sup> |                                                    |
| <i>Rarg</i>     | 0.87    | 1.54                 | 40            | Differentiation            | bone morphogenesis                                 |
| <i>Tead2</i>    | 1.03    | 1.15                 | 41            | Differentiation            | lateral mesoderm development                       |
| <i>Dnmt3b</i>   | 1.33    | 0.88                 | 42            | Pluripotency               | genetic imprinting                                 |
| <i>Nr5a2</i>    | 0.67    | 1.75                 | 43            | Reprogramming <sup>1</sup> |                                                    |
| <i>Nr1d2</i>    | 0.74    | 1.53                 | 44            | Differentiation            | regulation of skeletal muscle cell differentiation |
| <i>Cbx7</i>     | 1.14    | 0.99                 | 45            | Differentiation            | chromatin modification                             |
| <i>Bnip3</i>    | 1.40    | 0.77                 | 46            | Differentiation            | brown fat cell differentiation                     |
| <i>Rbpms</i>    | 1.63    | 0.64                 | 47            | Unknown                    | transcription, DNA-templated                       |
| <i>Zfp7</i>     | 0.91    | 1.15                 | 48            | Unknown                    | regulation of transcription, DNA-templated         |
| <i>Lin28a</i>   | 0.78    | 1.31                 | 49            | Reprogramming <sup>1</sup> |                                                    |
| <i>Zfp423</i>   | 0.55    | 1.79                 | 50            | Differentiation            | cell differentiation                               |

- 
- <sup>1</sup> González F, Boué S, Belmonte JCI (2011) Methods for making induced pluripotent stem cells: reprogramming à la carte. *Nat Rev Genet* 12: 231-242.
- <sup>2</sup> Khalfallah O, Rouleau M, Barbry P, Bardoni B, Lalli E (2009) Dax-1 knockdown in mouse embryonic stem cells induces loss of pluripotency and multilineage differentiation. *STEM CELLS* 27: 1529–1537.
- <sup>3</sup> Takahashi K, Yamanaka S (2006) Induction of pluripotent stem cells from mouse embryonic and adult fibroblast cultures by defined factors. *Cell* 126: 663-676.
- <sup>4</sup> Jiang J, Lv W, Ye X, Wang L, Zhang M, et al. (2013) Zscan4 promotes genomic stability during reprogramming and dramatically improves the quality of ips cells as demonstrated by tetraploid complementation. *Cell Res* 23: 92–106.
- <sup>5</sup> Lim LS, Loh YH, Zhang W, Li Y, Chen X, et al. (2007) Zic3 is required for maintenance of pluripotency in embryonic stem cells. *Molecular Biology of the Cell* 18: 1348-1358.
- <sup>6</sup> Yu Hb, Kunarso G, Hong FH, Stanton LW (2009) Zfp206, oct4, and sox2 are integrated components of a transcriptional regulatory network in embryonic stem cells. *Journal of Biological Chemistry* 284: 31327-31335.
- <sup>7</sup> Ye S, Li P, Tong C, Ying QL (2013) Embryonic stem cell self-renewal pathways converge on the transcription factor tfcp2l1. *EMBO J* 32: 2548–2560.
- <sup>8</sup> Lee H, Kim HJ, Lee YJ, Lee MY, Choi H, et al. (2012) Krüppel-like factor klf8 plays a critical role in adipocyte differentiation. *PLoS ONE* 7: e52474 EP -.
- <sup>9</sup> Davies OR, Lin CY, Radziszewska A, Zhou X, Taube J, et al. (2013) Tcf15 primes pluripotent cells for differentiation. *Cell Reports* 3: 472–484.
- <sup>10</sup> Young RA (2011) Control of the embryonic stem cell state. *Cell* 144: 940-954.
